# Supplementary material for: Noncompetitive homogeneous immunodetection of small molecules based on beta-glucuronidase complementation
Source: Royal Society of Chemistry journal article supplement (doi:10.1039/c8an00074c), 2018-01-01
Supplement: c8an00074c1.pdf [file c8an00074c1.pdf]

### Supplementary Information 1. Comparison of enzyme activity

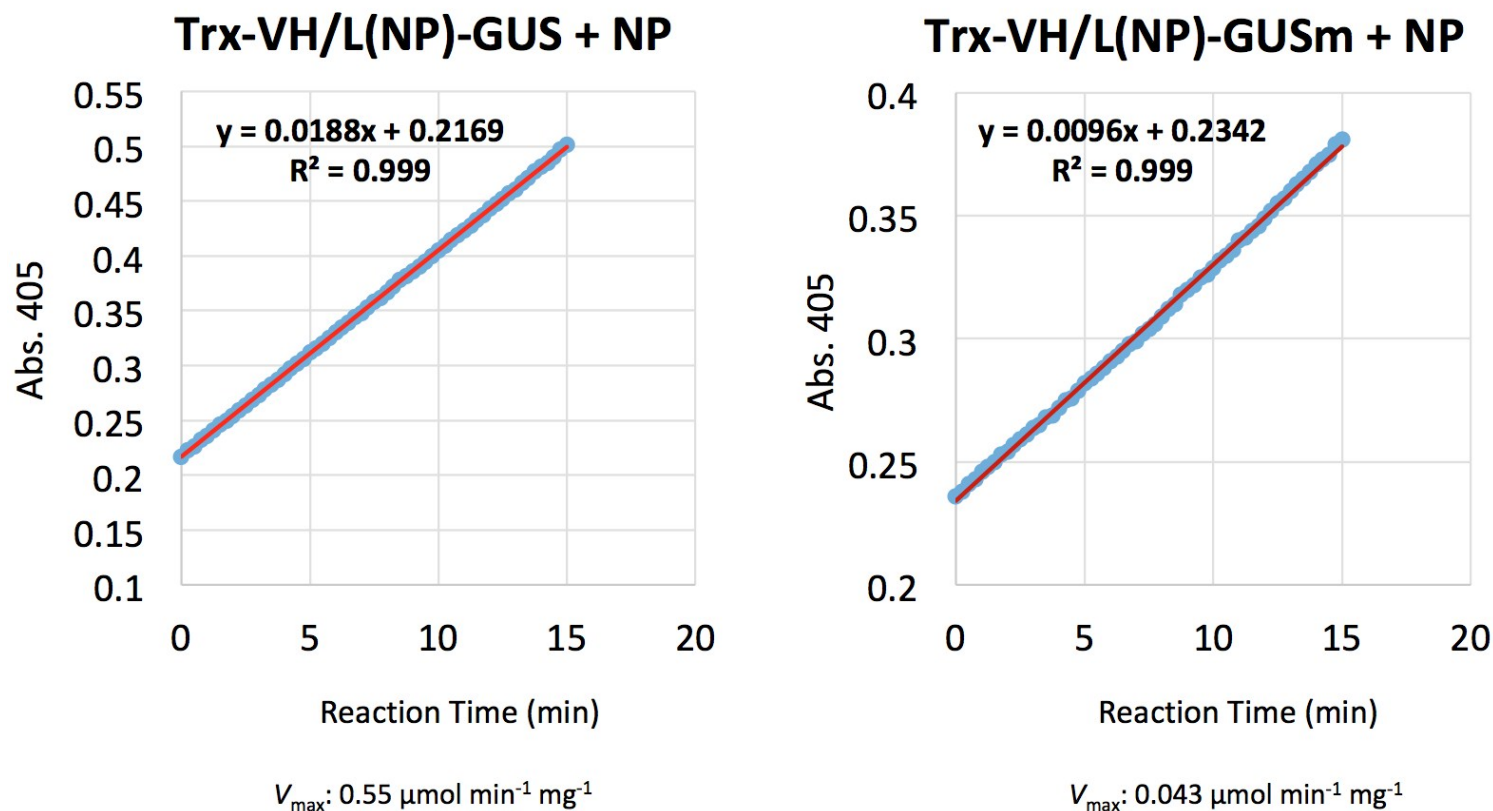

Mutant GUS fusion proteins and wild type GUS fusion proteins (0.1  $\mu\text{M}$  each in PBST) were mixed with antigen (1  $\mu\text{M}$  NP in PBST buffer), respectively. Absorbance at 405nm was measured every 15 seconds after adding substrate (1 mg/ml p-nitrophenyl- $\beta$ -D-glucuronide in PBST) using a Beckman DU530 spectrophotometer.

Since the concentration of NP was lower than the saturation in terms of activity, considering the NP dose-dependency (1000 for 1  $\mu\text{M}$  and 2500 for maximum activity), the maximum catalytic activity of GUSm is roughly estimated as 20% of the wild-type GUS.
